# Supplementary material for: Paclitaxel‐based supramolecular hydrogel loaded with mifepristone for the inhibition of breast cancer metastasis
Source: PubMed Central journal article supplement — Cancer Sci. 2021 Dec 18;113(2):733–43. doi: 10.1111/cas.15230 (PMC8819302; doi:10.1111/cas.15230), 2021-12-18
Supplement: CAS-113-733-s001.pdf [file CAS-113-733-s001.pdf]

---

## Supporting Information

### **A paclitaxel-based supramolecular hydrogel loaded with mifepristone for the inhibition of breast cancer metastasis**

Cui-Cui Zhao<sup>1</sup>, Chuan-Gui Zhang<sup>1</sup>, Xuan Sun<sup>1</sup>, Qingxiang Guo<sup>2</sup>, Jinjian Liu<sup>2</sup>, Yan Liu<sup>1</sup>, Ya-Nan Hao<sup>1</sup>

Guowei Feng<sup>1</sup>, Lijun Yang<sup>2\*</sup>, Hong Liu<sup>1\*</sup>, and Jianfeng Liu<sup>2\*</sup>

<sup>1</sup>Tianjin's Clinical Research Center for Cancer; Key Laboratory of Cancer Prevention and Therapy, Tianjin; Key Laboratory of Breast Cancer Prevention and Therapy, Tianjin Medical University, Ministry of Education; National Clinical Research Center for Cancer, Tianjin Medical University Cancer Institute and Hospital, Tianjin, China

<sup>2</sup>Key Laboratory of Radiopharmacokinetics for Innovative Drugs, Chinese Academy of Medical Sciences, and Institute of Radiation Medicine, Chinese Academy of Medical Sciences & Peking Union Medical College, Tianjin, China

#### **\*Corresponding Authors**

Prof. Lijun Yang, yanglijun@irm-cams.ac.cn

Prof. Hong Liu, E-mail: lh713@163.com

Prof. Jianfeng Liu, E-mail: liujianfeng@irm-cams.ac.cn

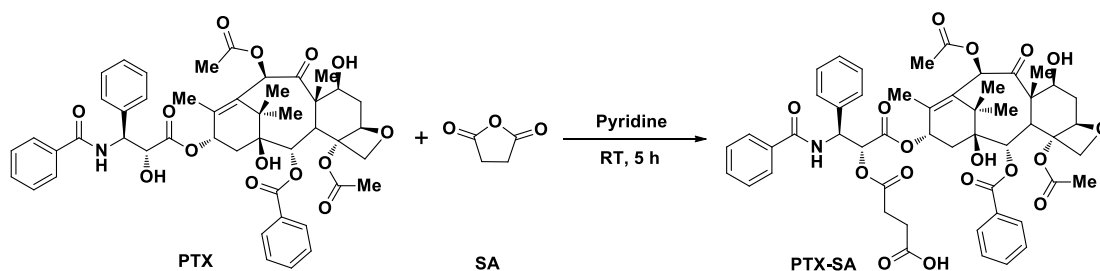

**Figure S1** Synthesis route for succinic anhydride-modified paclitaxel compound (PTX-SA).

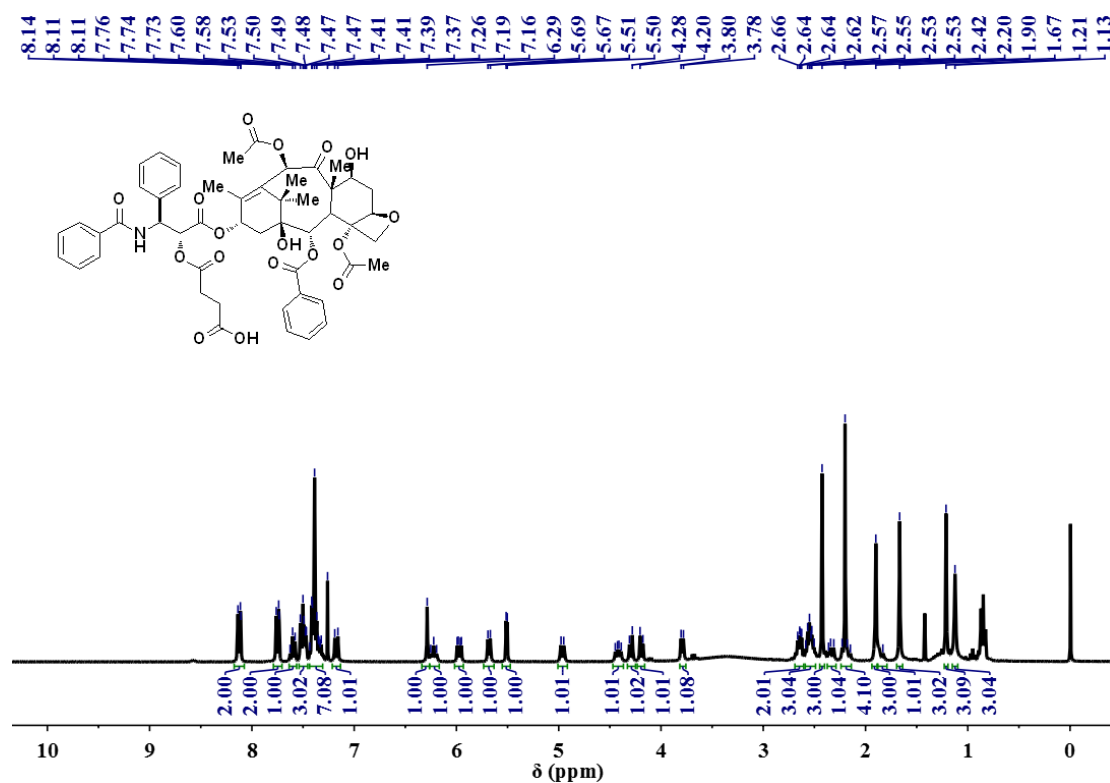

<sup>1</sup>H NMR (300 MHz, CDCl<sub>3</sub>) δ 8.17 – 8.07 (m, 2H), 7.79 – 7.71 (m, 2H), 7.60 (t, *J* = 7.3 Hz, 1H), 7.54 – 7.45 (m, 3H), 7.44 – 7.31 (m, 7H), 7.17 (d, *J* = 9.3 Hz, 1H), 6.29 (s, 1H), 6.22 (t, *J* = 8.6 Hz, 1H), 5.97 (dd, *J* = 9.3, 3.3 Hz, 1H), 5.68 (d, *J* = 7.0 Hz, 1H), 5.51 (d, *J* = 3.4 Hz, 1H), 4.96 (d, *J* = 7.9 Hz, 1H), 4.42 (dd, *J* = 10.8, 6.7 Hz, 1H), 4.29 (d, *J* = 8.4 Hz, 1H), 4.19 (d, *J* = 8.5 Hz, 1H), 3.79 (d, *J* = 7.0 Hz, 1H), 2.69 – 2.60 (m, 2H), 2.59 – 2.49 (m, 3H), 2.42 (s, 3H), 2.37 – 2.29 (m, 1H), 2.24 – 2.14 (m, 4H), 1.90 (s, 3H), 1.88 – 1.79 (m, 1H), 1.67 (s, 3H), 1.21 (s, 3H), 1.13 (s, 3H).

**Figure S2** <sup>1</sup>H NMR spectrum of succinic anhydride-modified paclitaxel compound (PTX-SA).

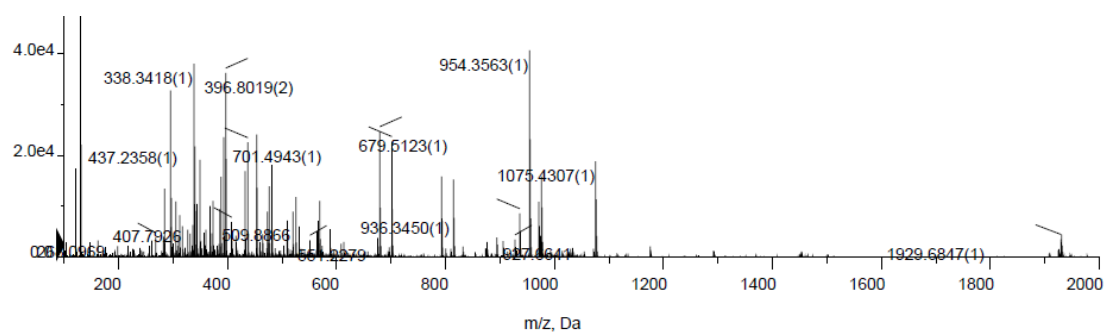

HRMS: calc.  $M = 953.3470$ , obsvd.  $(M + H)^+ = 954.3563$ .

**Figure S3** HRMS spectrum of succinic anhydride-modified paclitaxel compound (PTX-SA).

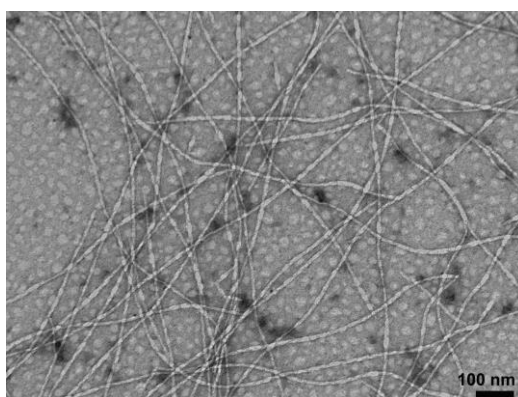

**Figure S4** TEM image of paclitaxel hydrogel (P-nano).

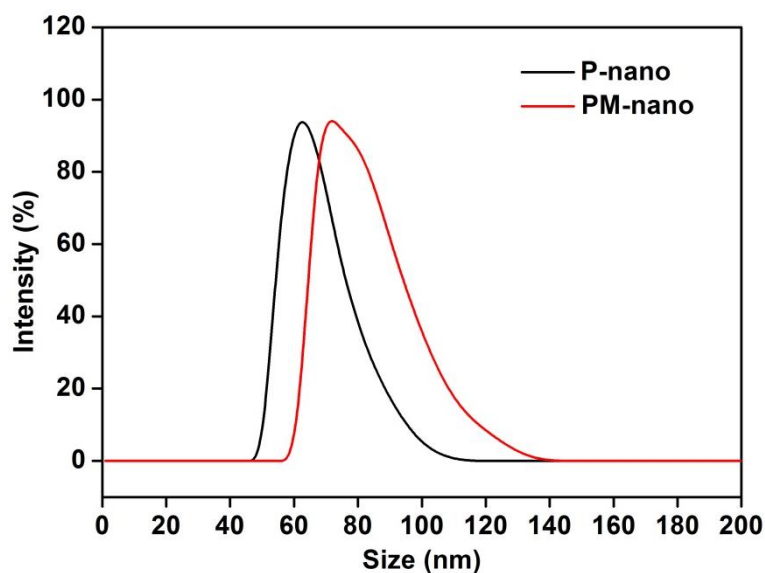

**Figure S5** Hydrodynamic size distribution of nanofibers. P-nano, paclitaxel (PTX) hydrogel; PM-nano, PTX-conjugated and mifepristone (MIF)-loaded hydrogel.

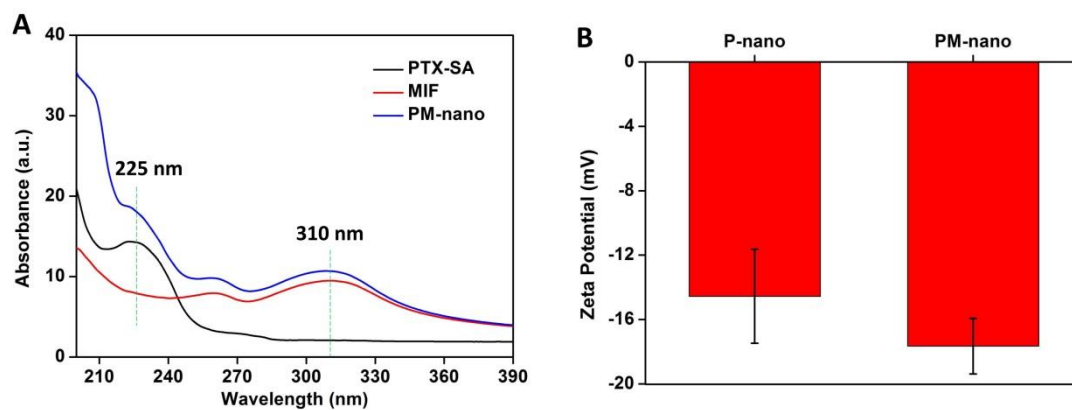

**Figure S6** UV-vis absorption spectra and zeta potential. (A), UV-vis absorption spectra of succinic anhydride-modified paclitaxel compound (PTX-SA), mifepristone (MIF), and PTX-conjugated and MIF-loaded hydrogel (PM-nano). (B), Zeta potential of PTX hydrogel (P-nano) and PM-nano.

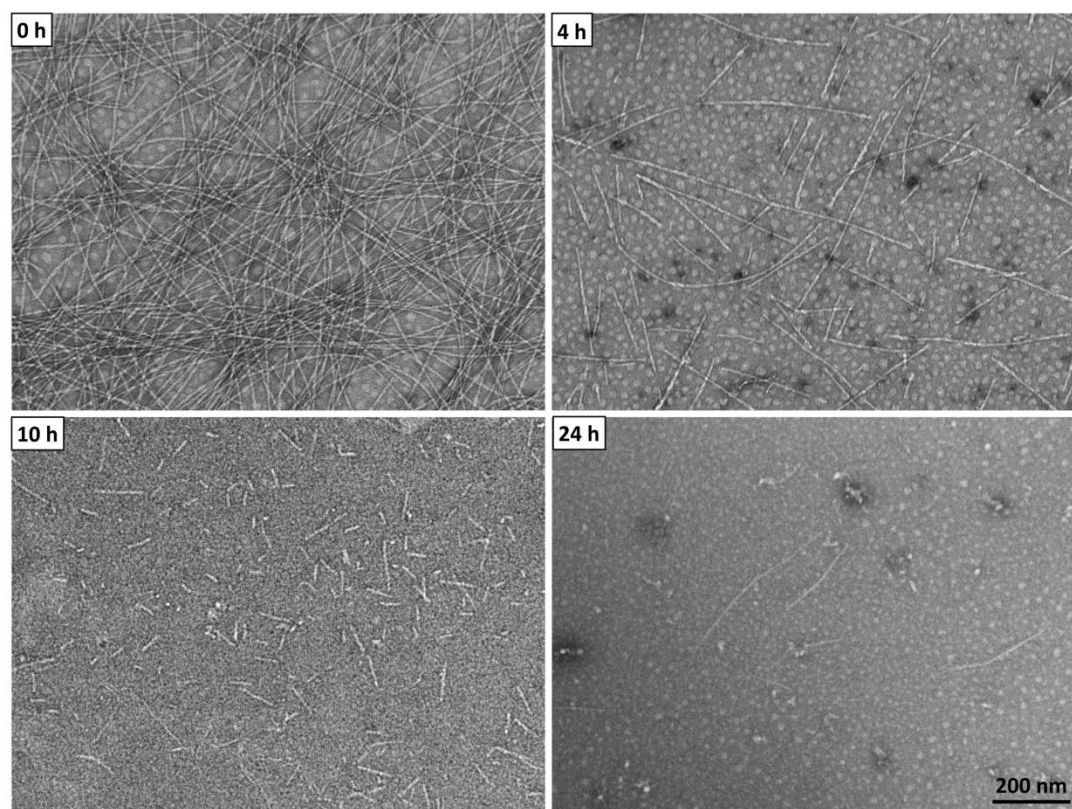

**Figure S7** TEM images of paclitaxel (PTX)-conjugated and mifepristone (MIF)-loaded hydrogel (PM-nano) after 0 h, 4 h, 10 h or 24 h of incubation with serum.

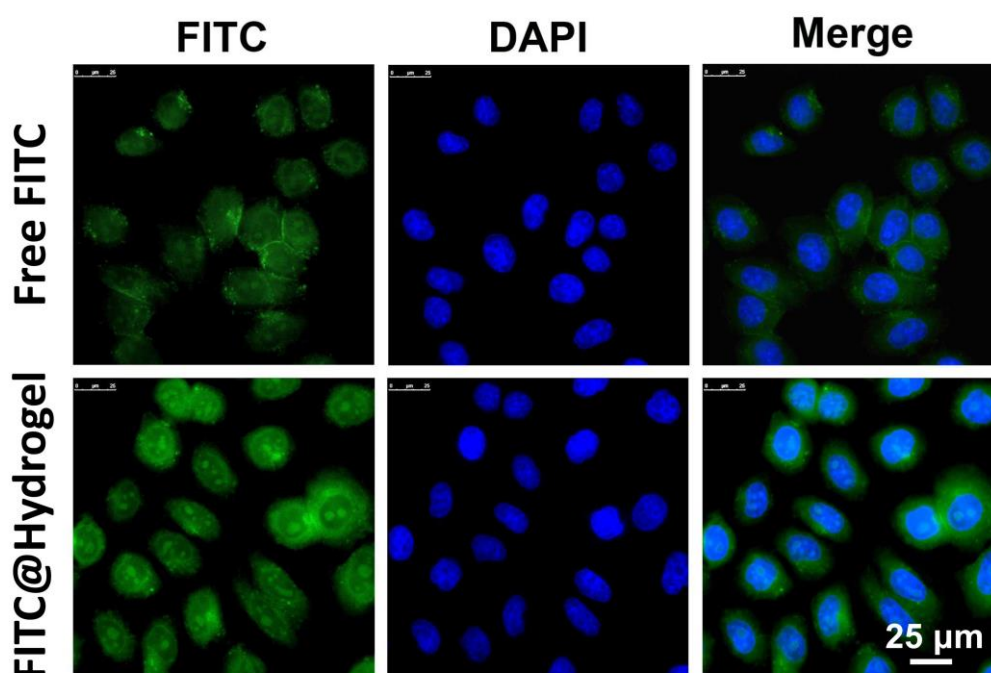

**Figure S8** Fluorescence images of MCF-7 cells treated with free FITC or FITC-loaded hydrogel (FITC@Hydrogel) after a 4 h of incubation with an equivalent FITC concentration (10 μg/mL).

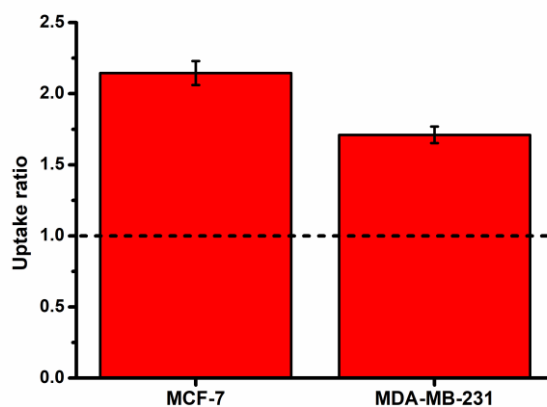

**Figure S9** Cellular uptake ratio of FITC-loaded hydrogel (FITC@Hydrogel) to free FITC determined by Image J software based on the average fluorescence intensity of MCF-7 and MDA-MB-231 cells after a 4 h of incubation.

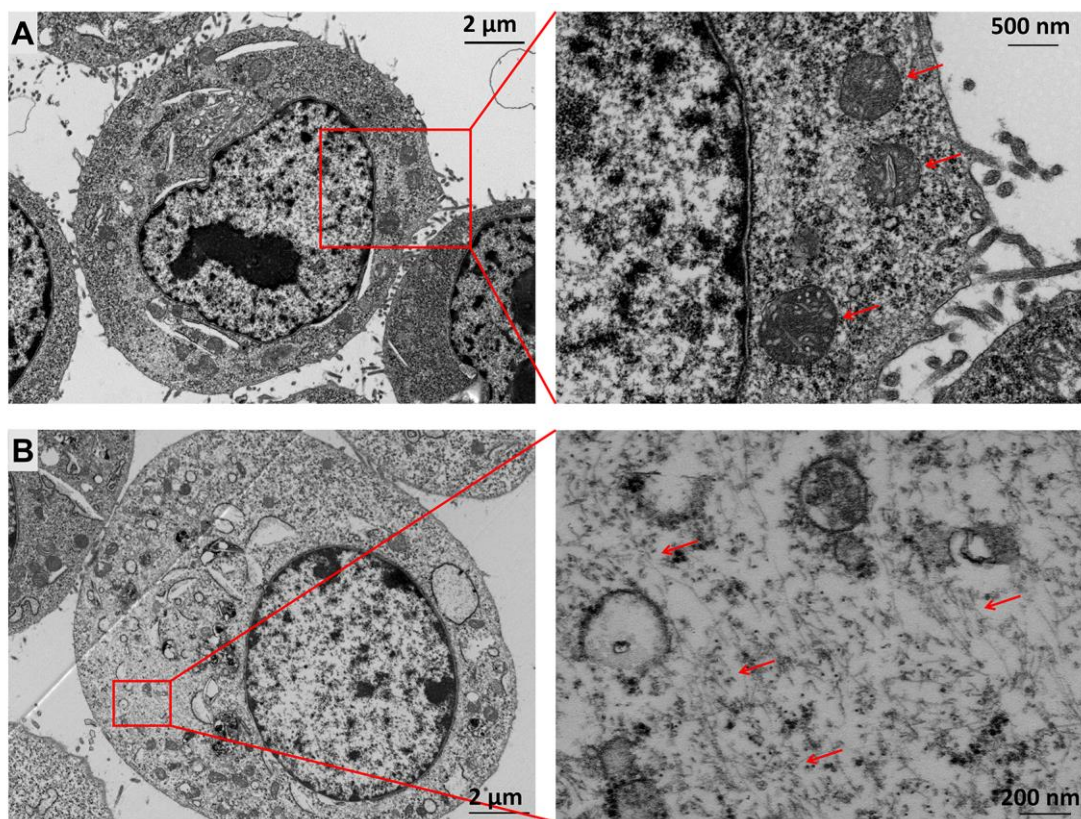

**Figure S10** TEM images of the nanofibers (red arrows) in the lysosome (A) and the cytoplasm (B) after a 4 h of co-incubation of 4T1 cells with paclitaxel (PTX)-conjugated and mifepristone (MIF)-loaded hydrogel (PM-nano).

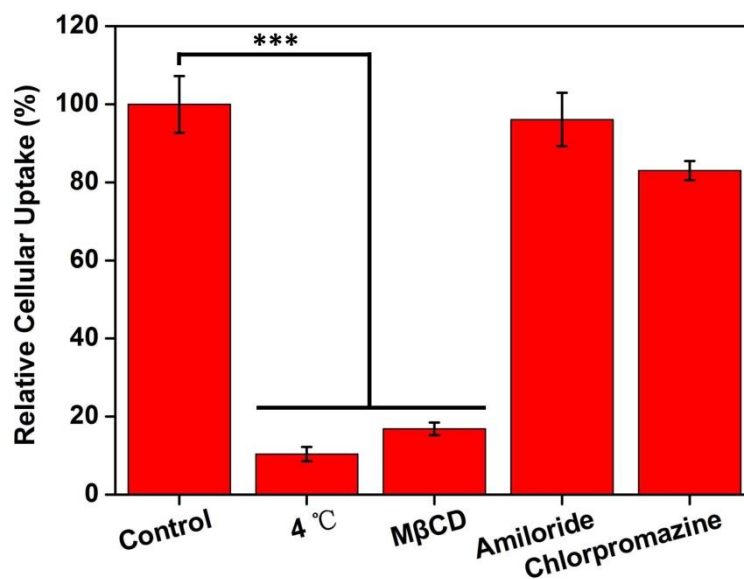

**Figure S11** Relative cellular uptake amount of paclitaxel (PTX)-conjugated and mifepristone (MIF)-loaded hydrogel (PM-nano) in 4T1 tumor cells with different treatments. \*\*\*  $P < 0.001$ . MβCD, methyl-β-cyclodextrin.

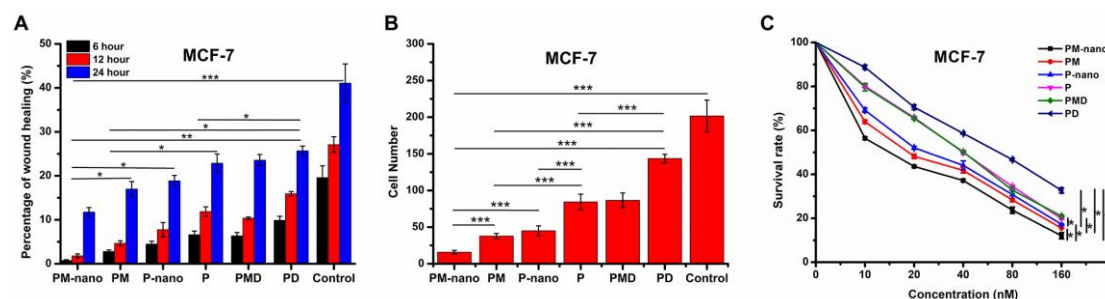

**Figure S12** Effects on the biological functions of MCF-7 cells. (A), Quantification analysis of the scratch-wounds of MCF-7 cells before and after 24 h of treatment with various materials. (B), Quantification analysis of the invaded MCF-7 cells after various treatments. (C), Cytotoxicity of various materials against MCF-7 cells evaluated by MTT assays. \*  $P < 0.05$ , \*\*  $P < 0.01$ , \*\*\*  $P < 0.001$ . P, paclitaxel; PD, paclitaxel + dexamethasone; PM, paclitaxel + mifepristone; PMD, paclitaxel + mifepristone + dexamethasone; PM-nano, paclitaxel-conjugated and mifepristone-loaded supramolecular hydrogel; P-nano, paclitaxel hydrogel.
